# Supplementary material for: Platelet-derived microvesicles induce calcium oscillations and promote VSMC migration via TRPV4
Source: PubMed Central journal article supplement (PMC7797689; doi:10.7150/thno.47182), 2021-01-01
Supplement: thnov11p2410s1.pdf [file thnov11p2410s1.pdf]

1 **47182f4**

## 2 **Supplemental Information**

3

### 4 **Supplement Experimental Procedures**

#### 5 **Reaction solution component reagents**

6 Tyrode solution: 12 mM NaHCO<sub>3</sub>, 138 mM NaCl, 5.5 mM glucose, 2.9 mM KCl, 2 mM MgCl<sub>2</sub>,  
7 0.42 mM NaH<sub>2</sub>PO<sub>4</sub>, and 10 mM 4-(2-hydroxyethyl)-1-piperazineethanesulfonic acid (pH 7.4);

8 Anticoagulant: 2.94% sodium citrate, 136 mM glucose, 0.1 g/ml PGE1, 1 U/ml apyrase (pH 6.4);

9 Lysis buffer: 50 mM Tris-HCl, 2% (w/v) SDS, 0.1% (w/v) bromophenol, 10% (v/v) glycerol, 1%  
10 (w/v) β-mercaptoethanol (pH 6.8).

11

#### 12 **Time-lapse video microscopy**

13 Time-lapse video microscopy was used to obtain the free migration cell tracks of individual  
14 VSMCs, as described in a previous study <sup>[1]</sup>. Briefly, the cell motility data were captured using  
15 an EVOS FL Auto Cell Imaging system (10x objective, Thermo Fisher, NY, USA). During the  
16 image capturing process, a temperature-control system with CO<sub>2</sub> supplement was used to  
17 maintain cell viability. Digital images were taken every 30 min for 24 h. The cell outlines and  
18 xy-centroids were determined using ImageJ software (NIH, USA).

19

#### 20 **Ingenuity pathway analysis**

21 We applied Ingenuity Pathway Analysis (IPA) software (Qiagen)  
22 (<https://www.qiagenbioinformatics.com/products/ingenuitypathway-analysis>, content version:  
23 43605602) to determine the relation among biological function, calcium molecules and PMV  
24 proteomics. IPA integrates the available knowledge on genes, drugs, chemicals, protein families,  
25 processes, and pathways based on the interactions and functions derived from the Ingenuity  
26 Pathways Knowledge Database Literature. IPA is used to understand the complex biological and

1 chemical systems at the core of life science research based on lectures or predicated analysis [2].

2

### 3 **Supplement Results**

4 We first explored the calcium effects for long time. Representative heat maps of normalized  
5 FRET/ECFP ratio at 0 s, ~500 s, ~1000 s, ~5000 s with PMVs illustrated calcium oscillations  
6 (Figure S4A). Bright field of VSMC showed a normal spreading morphology at the termination  
7 of 5000 s (Figure S4B). The average FRET/ECFP ratio were increased ~1.5-folds within 60 s  
8 with PMVs, and returned to static status ratio at about 5000 s (Figure S4C), related to Figure 2.

9

### 10 **Supplement Reference**

11 1. Allahverdian S, Chaabane C, Boukais K, Francis GA. Smooth muscle cell fate and plasticity in atherosclerosis.  
12 Cardiovasc Res. 2018; 114(4): 540-550.

13 2. Dalby B, Cates S, Harris A, Ohki EC, Tilkins ML, Price PJ, et al. Advanced transfection with Lipofectamine  
14 2000 reagent: primary neurons, siRNA, and high-throughput applications. Methods. 2004; 33(2):0-103.

15

1 **Supplement Table**

2 **Table S 1.** Designed specific siRNA sequences of TRPV4 (NM\_023970.1), related to Figure 5.

|       | sense ( 5'-3' )       | antisense ( 5'-3' )   |
|-------|-----------------------|-----------------------|
| si-1  | GCGAGAUCUACCAGUACUATT | UAGUACUGGUAGAUCUCGCTT |
| si-2  | CCGUGUCCUUCUACAUCAATT | UUGAUGUAGAAGGACACGGTT |
| si-3  | GACGUCCAAACCUGCGUAUTT | AUACGCAGGUUUGGACGUCTT |
| si-NC | UUCUCCGAACGUGUCACGUTT | ACGUGACACGUUCGGAGAATT |

3

4 **Table S 2.** 31 proteins expressed in PMVs related with calcium, related to Figure 2.

| Molecular name | Molecular name      |
|----------------|---------------------|
| A2M            | NAD <sup>+</sup>    |
| CCL5           | SWAP70              |
| TTR            | ATP5F1A             |
| ANXA6          | ACTB                |
| THBS1          | PPBP                |
| PPIA           | SLC4A7              |
| TGFB1          | CD36                |
| HTR2B          | EVPL1               |
| VCL            | ITGB3               |
| GSN            | PLA2G7              |
| HBA1           | ITPR3               |
| GP9            | VDAC1               |
| PECAM1         | DYSF                |
| ATP5F1B        | CCR1                |
| ITGA2B         | PIK <sub>3</sub> CG |
| TTN            |                     |

5

1 Supplement Figures and Legends

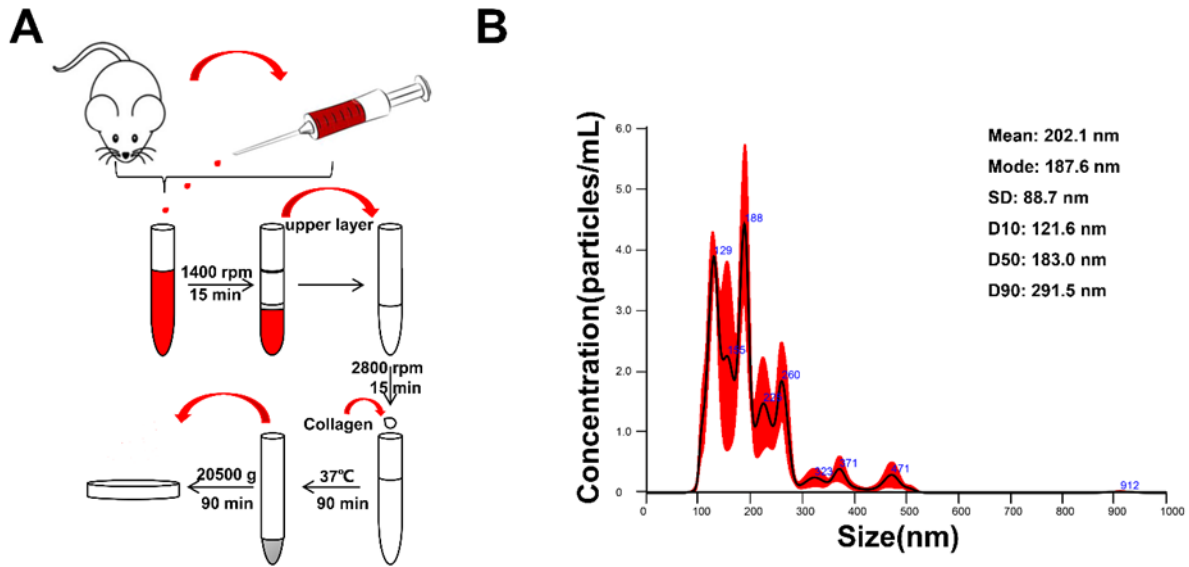

2

3 **Figure S1.** Procedure chart of PMVs extraction and enrichment *in vitro*(A) and PMVs size  
4 distribution detected by NanoSight3000 after collagen activation. Abscissa represents vesicles  
5 size and ordinate represents the enrichment degree of vesicles (B), related to Figure 1.

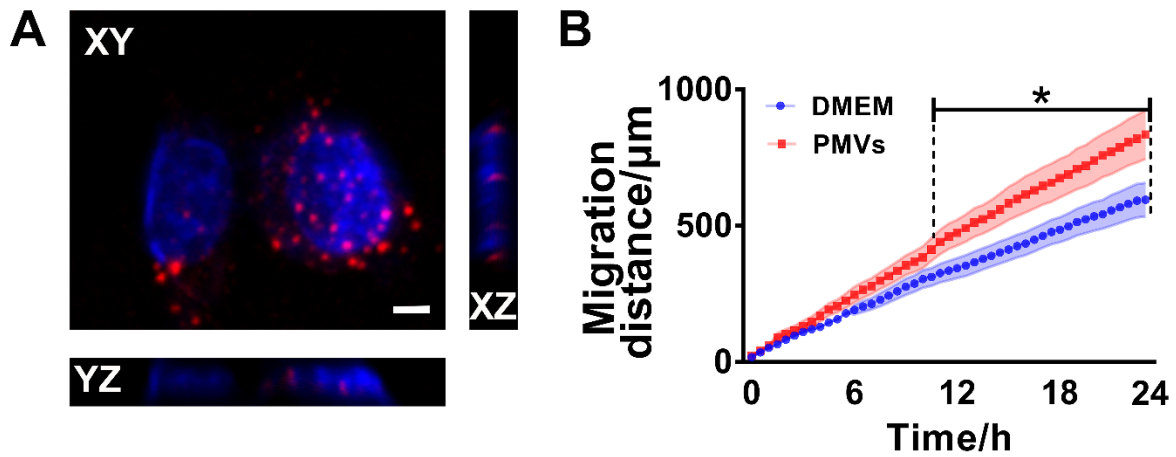

1

2 **Figure S2.** VSMCs were fixed and processed for staining using membrane dye PKH-26 (red),  
 3 and DAPI was used as a nuclear marker, and images were collected using confocal  
 4 microscopy(A). Serum-deprived VSMCs were stimulated with PMVs or DMEM for 24 h.  
 5 Images were captured by EVOS FL Auto Cell Imaging system at an interval of 30 min for 24 h.  
 6 The migration distance of VSMCs simulated with PMVs (red) and DMEM (blue) was shown in  
 7 (B). Abscissa represents the time point, ordinate represents the migration distance and all shadow  
 8 area indicated S.E.M., \*  $P < 0.05$ , related to Figure 1.

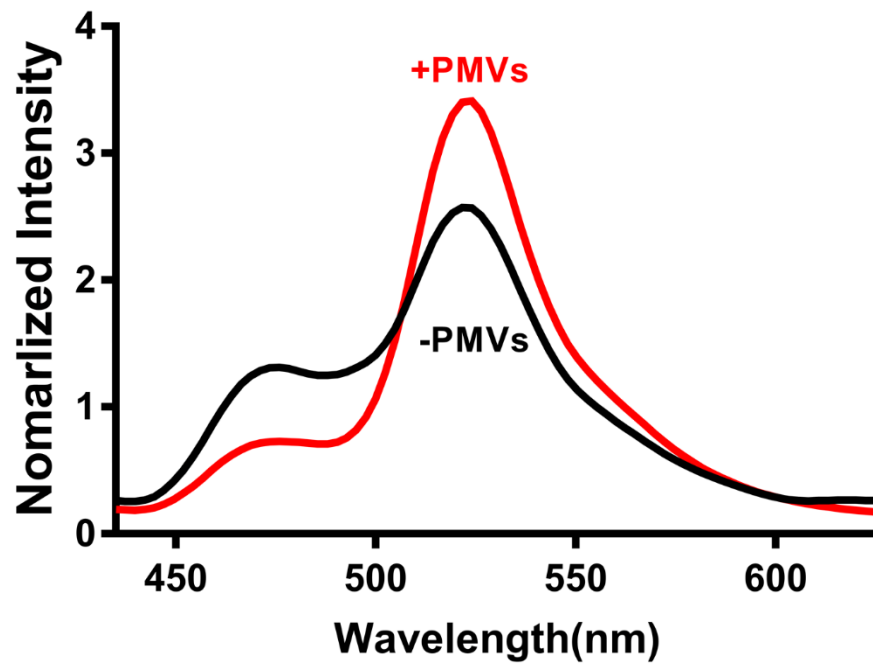

1

2 **Figure S3.** The emission spectra change of the cytoplasmic calcium biosensor before (black) and  
3 after (red) PMVs stimulation. related to Figure 2.

1

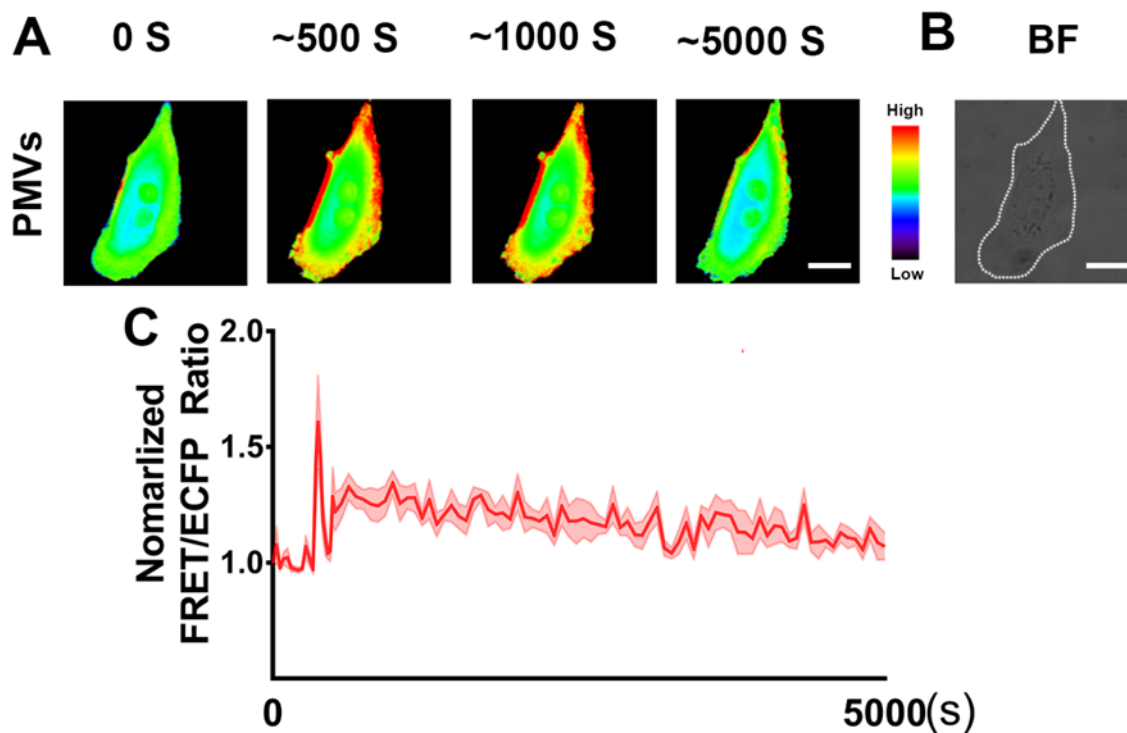

2

3 **Figure S4.** Representative heat maps of normalized FRET/ECFP ratio at 0 s, ~500 s, ~1000 s,  
4 ~5000 s of PMVs. The color scale bars represent the range of ratio, with cold and hot colors  
5 indicating low and high levels of calcium change (A). Bright field of the VSMC revealed that the  
6 VSMC is alive at the termination of 5000 s (B). The time courses represent the normalized  
7 FRET/ECFP ratio averaged over the cell body in the VSMC stimulated with PMVs respectively  
8 and all shadow area indicated S.E.M. (C). Scale bar: 20  $\mu$ m. Data are expressed as Mean  $\pm$   
9 S.E.M.. related to Figure 2.

1

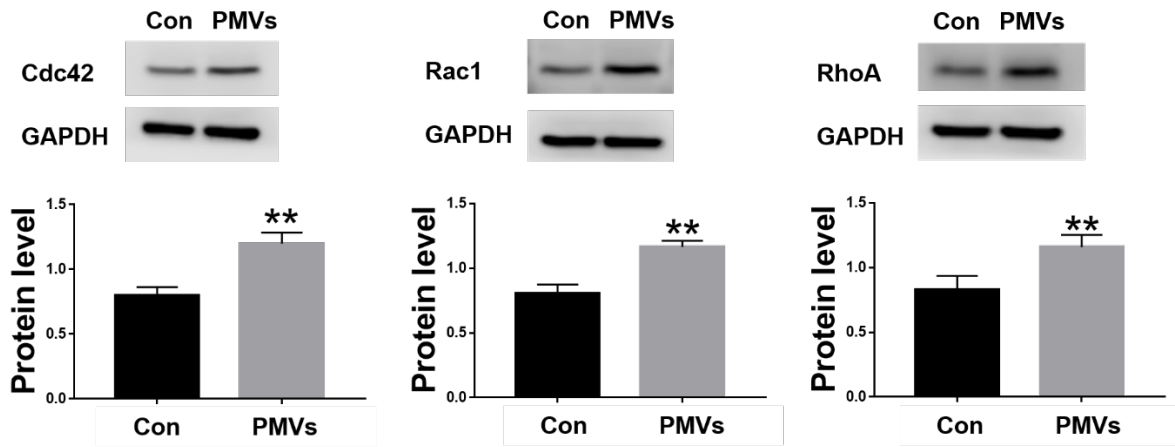

2

3 **Figure S5.** After 24-hour stimulation, the protein level of Cdc42, Rac1 and RhoA were  
4 significantly increased by the PMVs, which induces calcium influx in VSMCs. \*\*  $P < 0.01$  vs.  
5 DMEM control, n=3.



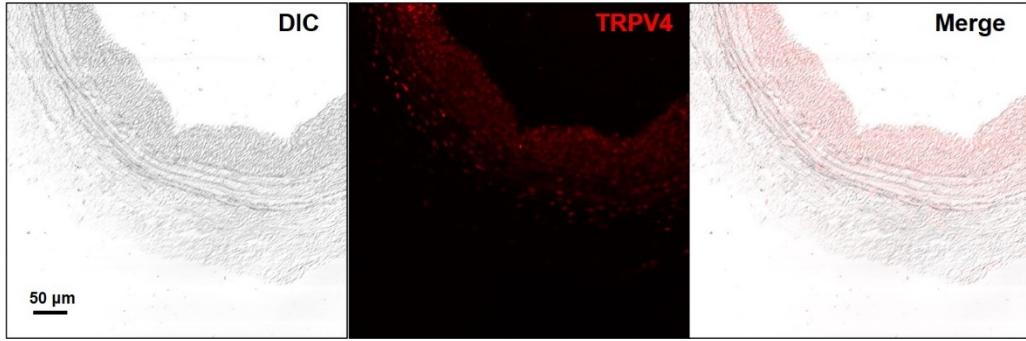

1

2 **Figure S6.** After the injury for 28 days, carotid arteries were collected and then TRPV4  
3 expression (red) in the neointimal hyperplasia was detected by immunofluorescence staining.

4 Scale bar: 50 μm.

**A**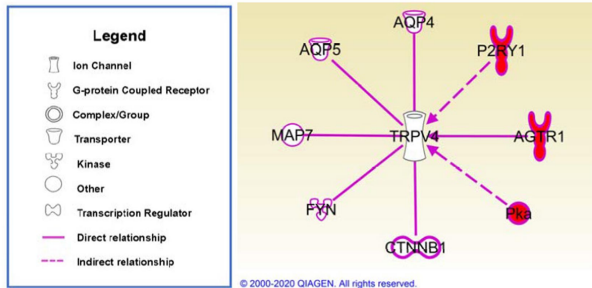**B**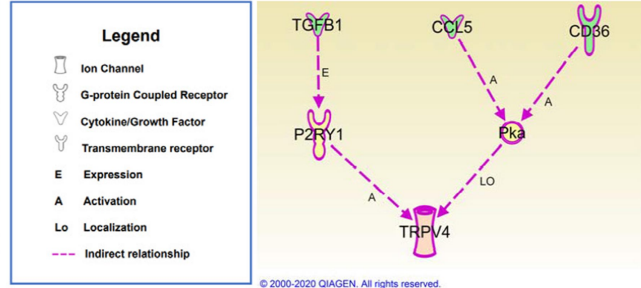

1  
2  
3  
4  
5  
6  
7

**Figure S7.** (A) The three upstream regulators (red) associated with TRPV4 were determined by IPA software. (B) The signaling pathways that PMVs regulated TRPV4 were determined by IPA software. Three molecules in PMVs associated with TRPV4 were indicated in green and the two upstream regulators of TRPV4 were indicated in yellow.

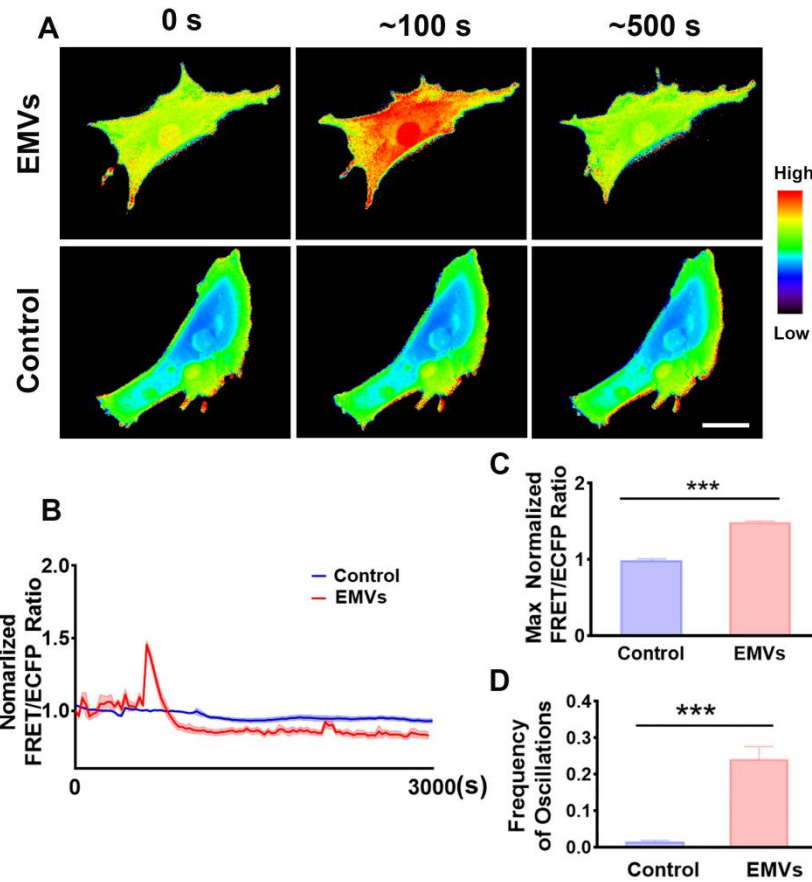

1  
2 **Figure S8.** Calcium oscillations in VSMC in response to EMVs. (A) Time-lapsed FRET images  
3 of cytoplasmic calcium change in the VSMC treated with EMVs (top) and DMEM control  
4 (bottom). The hot and cold color represent high and low FRET ratios, indicating high and low  
5 level of cytoplasmic calcium change. Scale bar: 30  $\mu\text{m}$ . (B) The time courses represent the  
6 normalized FRET/ECFP ratio averaged over the cell body in the VSMC treated with EMVs (n=8)  
7 and DMEM control (n=8) and all shadow area indicated S.E.M.. Comparison of max normalized  
8 FRET/ECFP ratio (C), frequency of the cytoplasmic calcium oscillations (D) between the  
9 VSMCs treated with EMVs (n=8) and DMEM control (n=8). Data are expressed as Mean  $\pm$   
10 S.E.M.. Respectively \*\*\*P < 0.001.

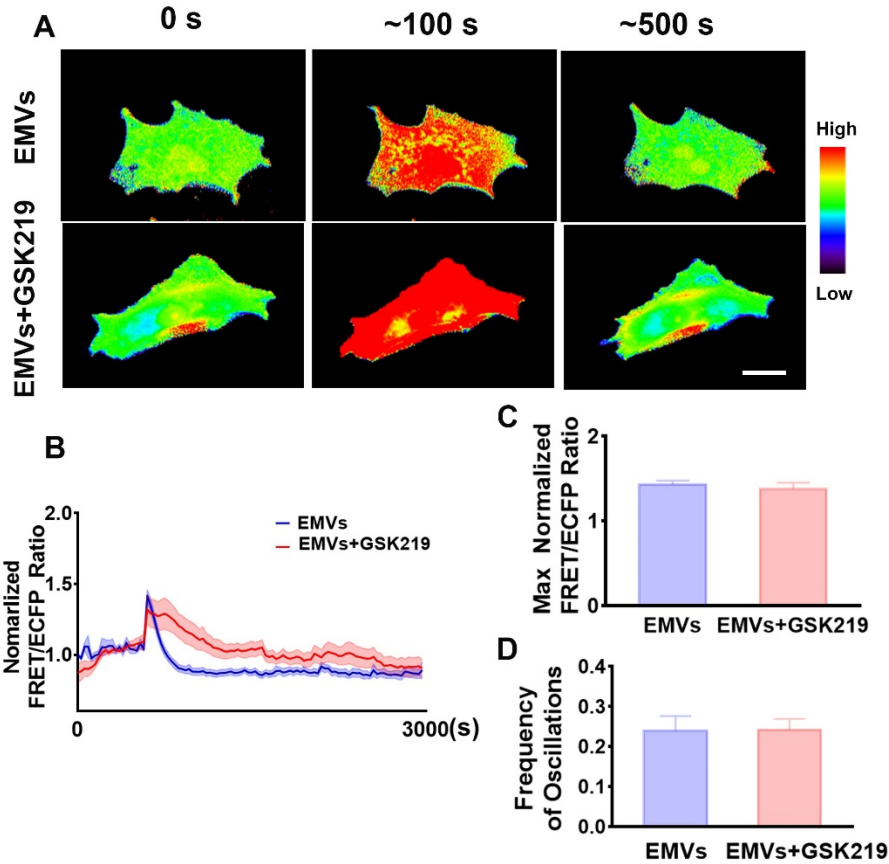

1  
2 **Figure S9.** The role of TRPV4 antagonist GSK219 in EMVs induced calcium oscillations in  
3 VSMCs. (A) The FRET images of calcium upon EMVs application in the VSMCs pretreated  
4 with GSK219 (bottom) and DMSO control (top). The hot and cold color represent high and low  
5 FRET ratios, indicating high and low level of cytoplasmic calcium change. Scale bar: 30  $\mu$ m.  
6 (B) The time courses represent the normalized FRET/ECFP ratio averaged over the cell body in  
7 the VSMC pretreated with GSK219 (n=8, red) and DMSO (n=8, blue) after EMVs application  
8 and all shadow area indicated S.E.M.. Comparison of frequency of the cytoplasmic calcium  
9 oscillations (C), max normalized FRET/ECFP ratio (D) between the VSMCs pretreated with  
10 GSK219 (n=8, red) and DMSO (n=8, blue) after EMVs application.

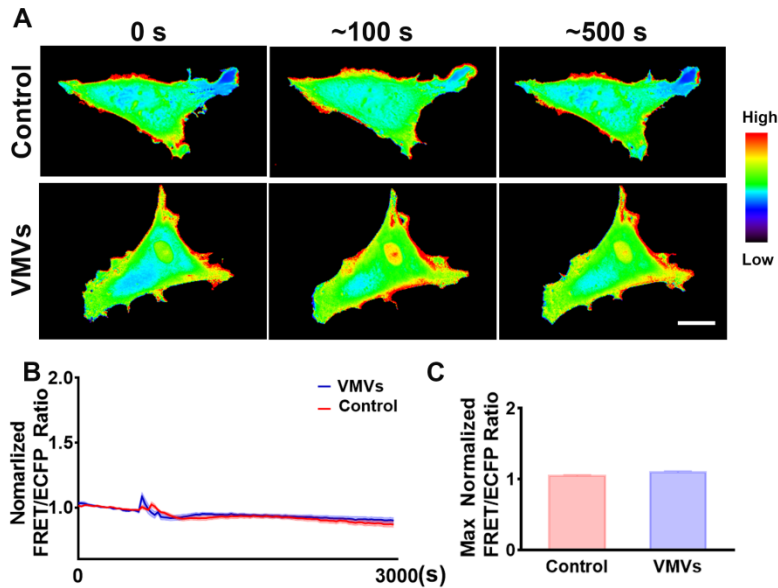

1  
 2 **Figure S10.** Calcium oscillations in VSMC in response to VMVs. (A) Time-lapsed FRET  
 3 images of cytoplasmic calcium change in the VSMC treated with VMVs (top) and DMEM  
 4 control (bottom). The hot and cold color represent high and low FRET ratios, indicating high  
 5 and low level of cytoplasmic calcium change. Scale bar: 30  $\mu$ m. (B) The time courses represent  
 6 the normalized FRET/ECFP ratio averaged over the cell body in the VSMC treated with VMVs  
 7 (n=8) and DMEM control (n=8) and all shadow area indicated S.E.M.. (C) Comparison of max  
 8 normalized FRET/ECFP ratio between the VSMCs treated with VMVs (n=8) and DMEM control  
 9 (n=8). Data are expressed as Mean  $\pm$  S.E.M..

1 **Supplement Videos**

2 **Video S1** Single cell migration induced by DMEM(A) and PMVs(B), related to Figure 1.

3 **Video S2** The FRET/ECFP ratio heat map video before and after PMVs(A) or DMEM  
4 stimulation(B), related to Figure 2.

5 **Video S3** The FRET/ECFP ratio heat map video before and after PMVs stimulation in  
6  $\text{Ca}^{2+}$ -free(A), 2-APB(B) and DMSO(C), related to Figure 3.

7 **Video S4** The FRET/ECFP ratio heat map video before and after PMVs stimulation in  
8 pre-incubating in Nife(A), GSK219(B) and DMSO(C), related to Figure 4.

9 **Video S5** The FRET/ECFP ratio heat map video before and after PMVs stimulation in si-NC(A)  
10 and si-1-cy3(B), related to Figure 5.
